# Supplementary material for: Exercise Intervention Promotes the Growth of Synapses and Regulates Neuroplasticity in Rats With Ischemic Stroke Through Exosomes
Source: Frontiers journal article supplement (doi:10.3389/fneur.2021.752595), 2021-10-28

## The MCAO model

1. After the rats awakened, a Longa score of 1-3 points was used as the standard for successful modeling.

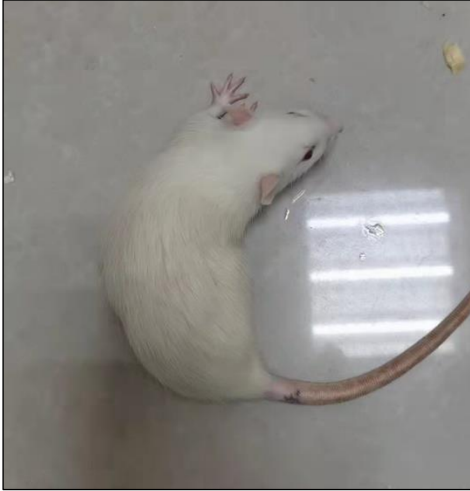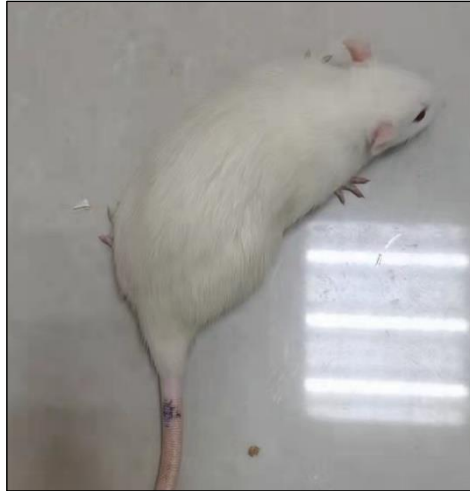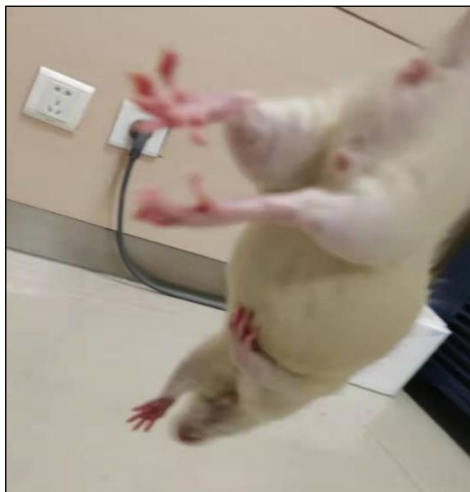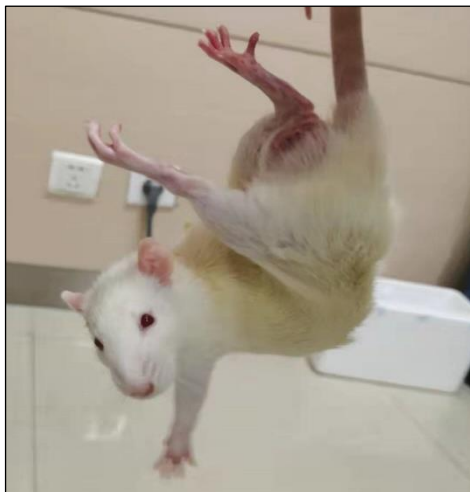

2. TTC staining 1d after MCAO. Statistical analysis showed that there was no difference in the infarct volume ratio.

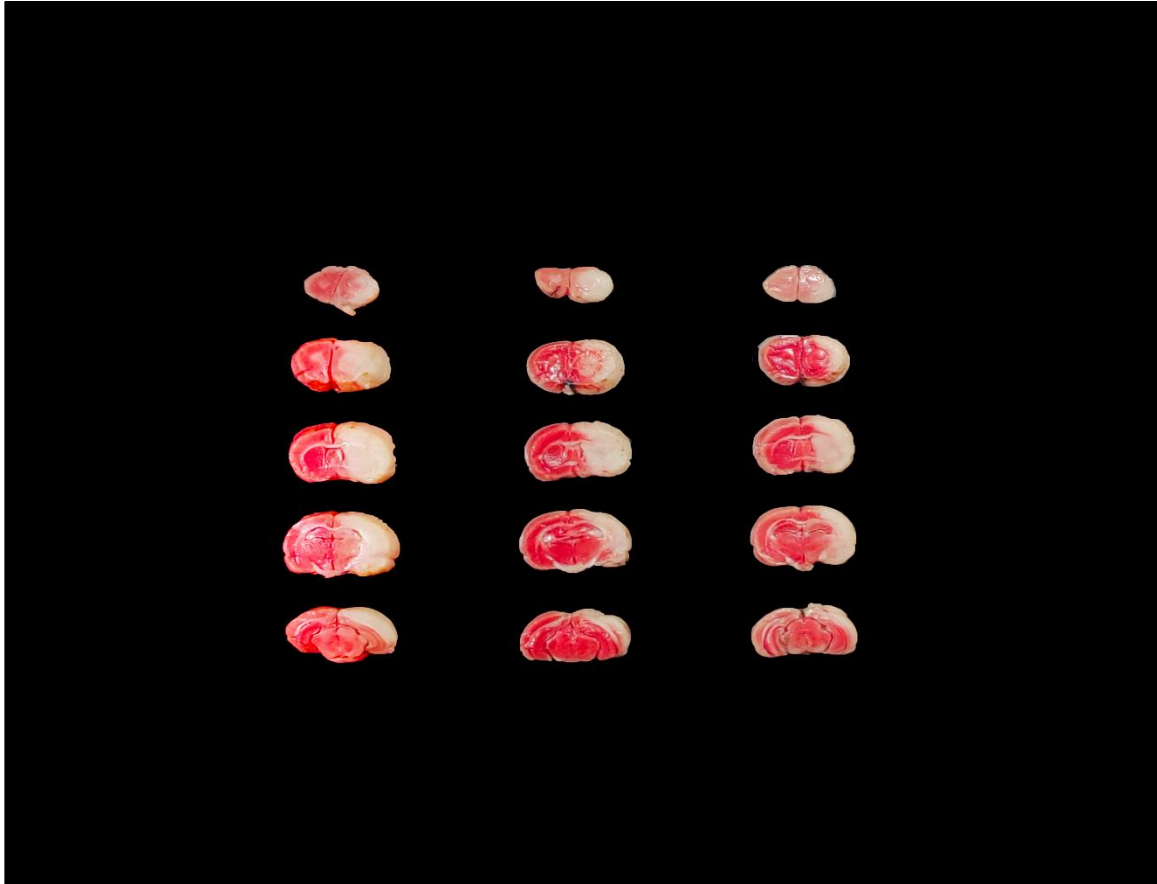

Supplement: Data_Sheet_1.PDF [file Data_Sheet_1.PDF]
